# Supplementary material for: Ultrafast Carrier Dynamics in 2D NbTe2 Films
Source: Research Square preprint supplement (doi:10.21203/rs.3.rs-1563068/v1), 2022-04-18
Supplement: Supplementary file 1 [file 190741ce8f737173caf915de.docx]

**SUPPORTING INFORMATION**


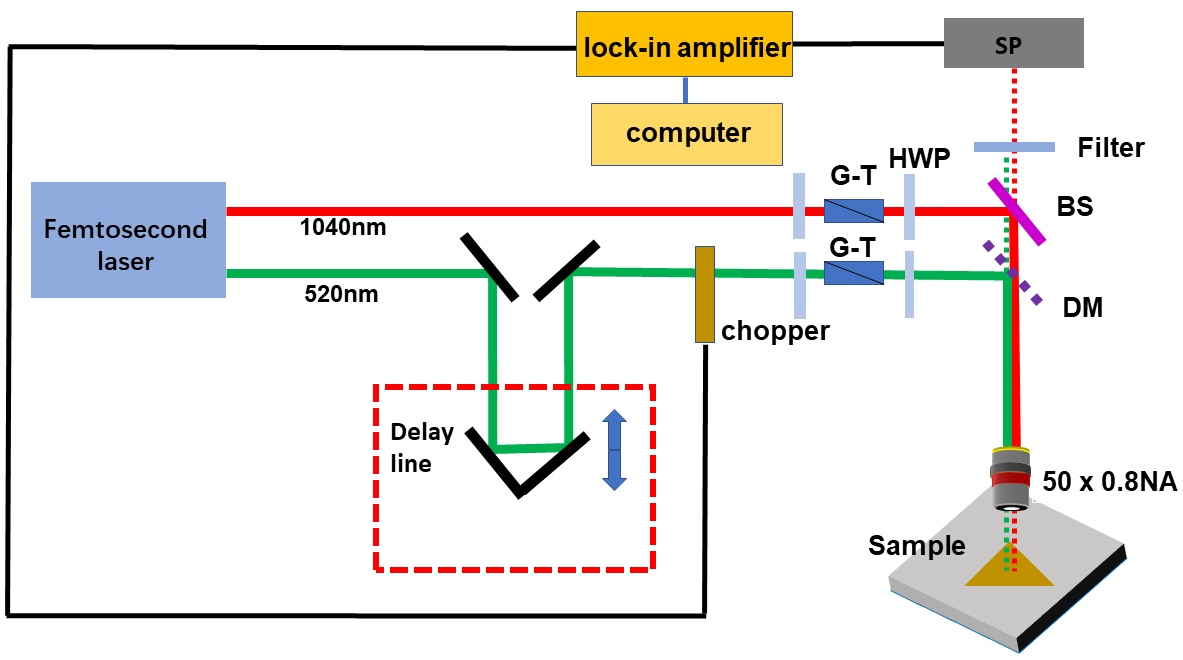


**Figure** **S1.** Schematic diagram for the time-resolved transient reflection measurement system. BS: beam-splitter; HWP: half-wave plate; DM: dichroic mirror; SP: Silicon photodiode detector; G-T: Glan-Taylor prism.


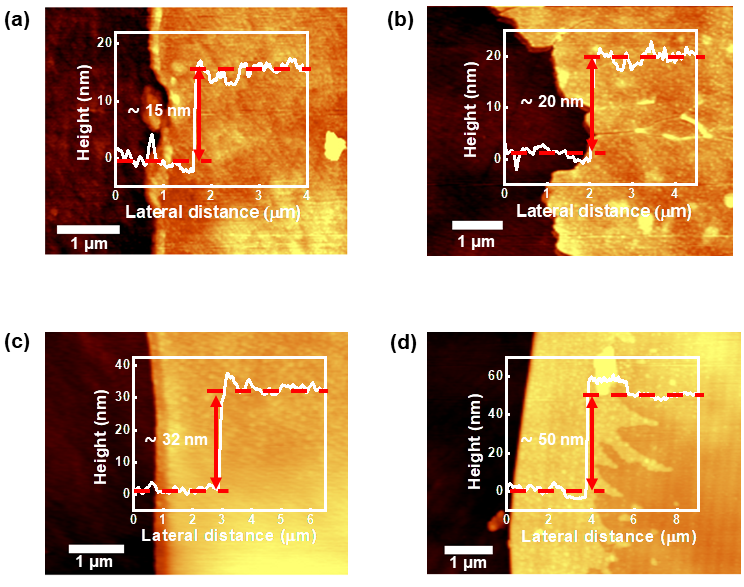


**Figure S2.** (a)–(d) AFM images and height profiles for NbTe2 samples with different thicknesses.


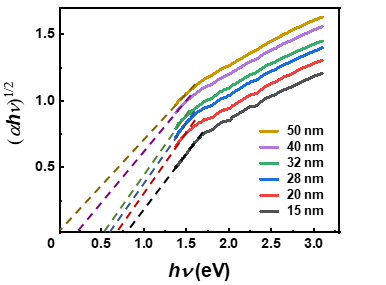


**Figure S3.** Tauc plots of NbTe2 flakes with different thicknesses.


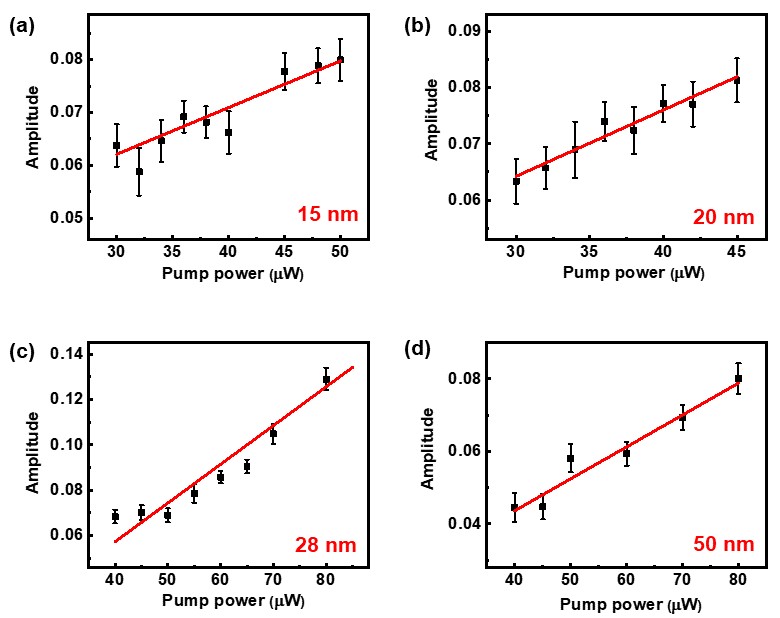


**Figure S4.** (a)–(d) Peak amplitudes of the Δ*R* curves as a function of the pump power for NbTe2 flakes with different thicknesses. The black solid squares represent the experimental data, and the red solid line is the linear fit.


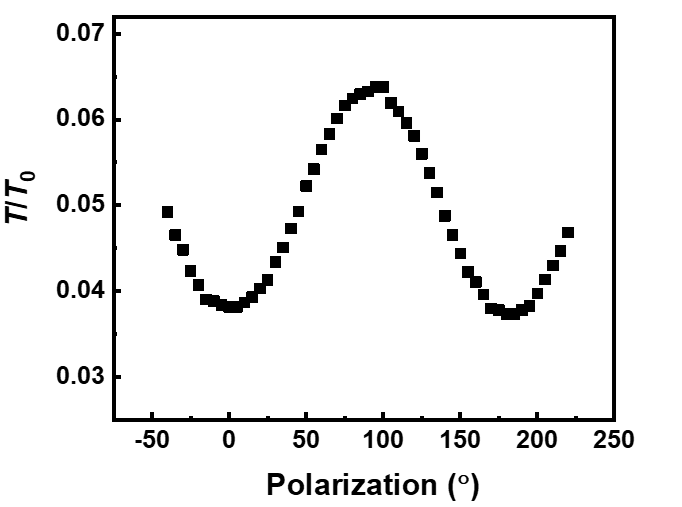


**Figure S5.** Polarization-resolved transmission of 520 nm pump light in NbTe2 sample. *T* and *T0* are measured transmissions for the sample and quartz substrate, respectively.
